# Supplementary material for: Novel laser-assisted glass frit encapsulation for long-lifetime perovskite solar cells
Source: Royal Society of Chemistry journal article supplement (doi:10.1039/d0ta05583b), 2020-01-01
Supplement: d0ta05583b1.pdf [file d0ta05583b1.pdf]

## Electronic Supporting Information

### Novel laser-assisted glass frit encapsulation for long-lifetime perovskite solar cells

Jorge Martins<sup>1†</sup>, Seyedali Emami<sup>1†</sup>, Rúben Madureira<sup>1,2</sup>, Joaquim Mendes<sup>2,3</sup>, Dzmitry Ivanou<sup>1,\*</sup>, Adélio Mendes<sup>1,\*</sup>

<sup>1</sup> LEPABE - Laboratory for Process Engineering, Environment, Biotechnology and Energy, Faculty of Engineering,  
University of Porto, Rua Dr. Roberto Frias, 4200-465 Porto, Portugal

<sup>2</sup> INEGI - Institute of Science and Innovation in Mechanical and Industrial Engineering, Faculty of Engineering,  
University of Porto, Rua Dr. Roberto Frias, 4200-465 Porto, Portugal

<sup>3</sup> FEUP - Faculty of Engineering, University of Porto, Rua Dr. Roberto Frias, 4200-465 Porto, Portugal

\* Corresponding authors emails: mendes@fe.up.pt and ivanou@fe.up.pt

† These authors contributed equally to this work.

## Model Equations

### Fourier's Law

$$\frac{\partial^2 T}{\partial x^2} + \frac{\partial^2 T}{\partial y^2} + \frac{\partial^2 T}{\partial z^2} + \frac{\dot{q}}{k} = \frac{\rho C_p \partial T}{k \partial t} \quad (S1)$$

### Coupled thermo-elastic-plastic differential equations

$$\begin{aligned} \int_v \{\varepsilon\}^T [C_{ep}] \{\varepsilon\} dv + \int_v \{\varepsilon\}^T \{\gamma\} T dv &= \int_v \{V\}^T \{f\} dv + \int_S \{V\}^T \{p\} dS \\ \int_v (\rho_0 C_p + \bar{\gamma}) \{T\}^T \{T\} dv - \int_v \{\beta\}^T \{\varepsilon\} \{T\} dv \\ &= \int_v D \{T\}^T dv + \int_v Q(r) \{T\} dv + \int_v \{T_{,i}\}^T [k] \{T_{,j}\} dv + \int_S \{q\}^T \{n\} \{T\} dS \end{aligned} \quad (S2)$$

where  $\varepsilon$  is the strain,  $[C_{ep}]$  is the elastic-plastic matrix,  $[k]$  is the thermal conductivity matrix,  $D$  is the thermoplastic coupling factor,  $T$  is the temperature,  $\rho$  is the specific mass,  $q$  is the heat flux,  $\gamma$  is the generalized thermal modulus,  $C_p$  is the specific heat,  $\beta$  is the thermal modulus tensor,  $Q$  is the heat generation,  $V$  the rate of displacement,  $f$  is the body forces and  $p$  is the surface tractions.

### Simulation assumptions

The following main assumptions were considered: i) air convection at the sides of the substrates are negligible; ii) emissivity of the glass substrate is 1, and there is no radiation or convection in the space between the two substrates; iii) the laser beam is absorbed at the top of glass frit and the laser beam absorption in the cover substrate is negligible; iv) the glass frit is bonded to the both substrates; v) materials are isotropic and thermal and mechanical properties are constant with temperature; this includes the three layers of glass frit here treated as made of a single material. Quadratic mesh elements were considered, with mesh sizes of  $< 25 \mu\text{m}$  for the glass frit and  $< 1 \text{ mm}$  for the rest of the bodies. The properties of the glass frit and substrates are presented in Table S1.

**Table S1** – Properties of the glass frit and substrates used in the thermal stress simulation.

|                                                                | Glass frit | Substrate |
|----------------------------------------------------------------|------------|-----------|
| $\rho$ [kg m <sup>3</sup> ]                                    | 5000       | 2500      |
| CTE [ $10^{-6} \text{ }^\circ\text{C}^{-1}$ ]                  | 8          | 8.5       |
| E [GPa]                                                        | 80         | 50        |
| Poisson's ratio                                                | 0.3        | 0.18      |
| Thermal Conductivity [W $^\circ\text{C}^{-1} \text{ m}^{-1}$ ] | 3          | 1.4       |
| Specific Heat [J kg <sup>-1</sup> $^\circ\text{C}^{-1}$ ]      | 600        | 750       |

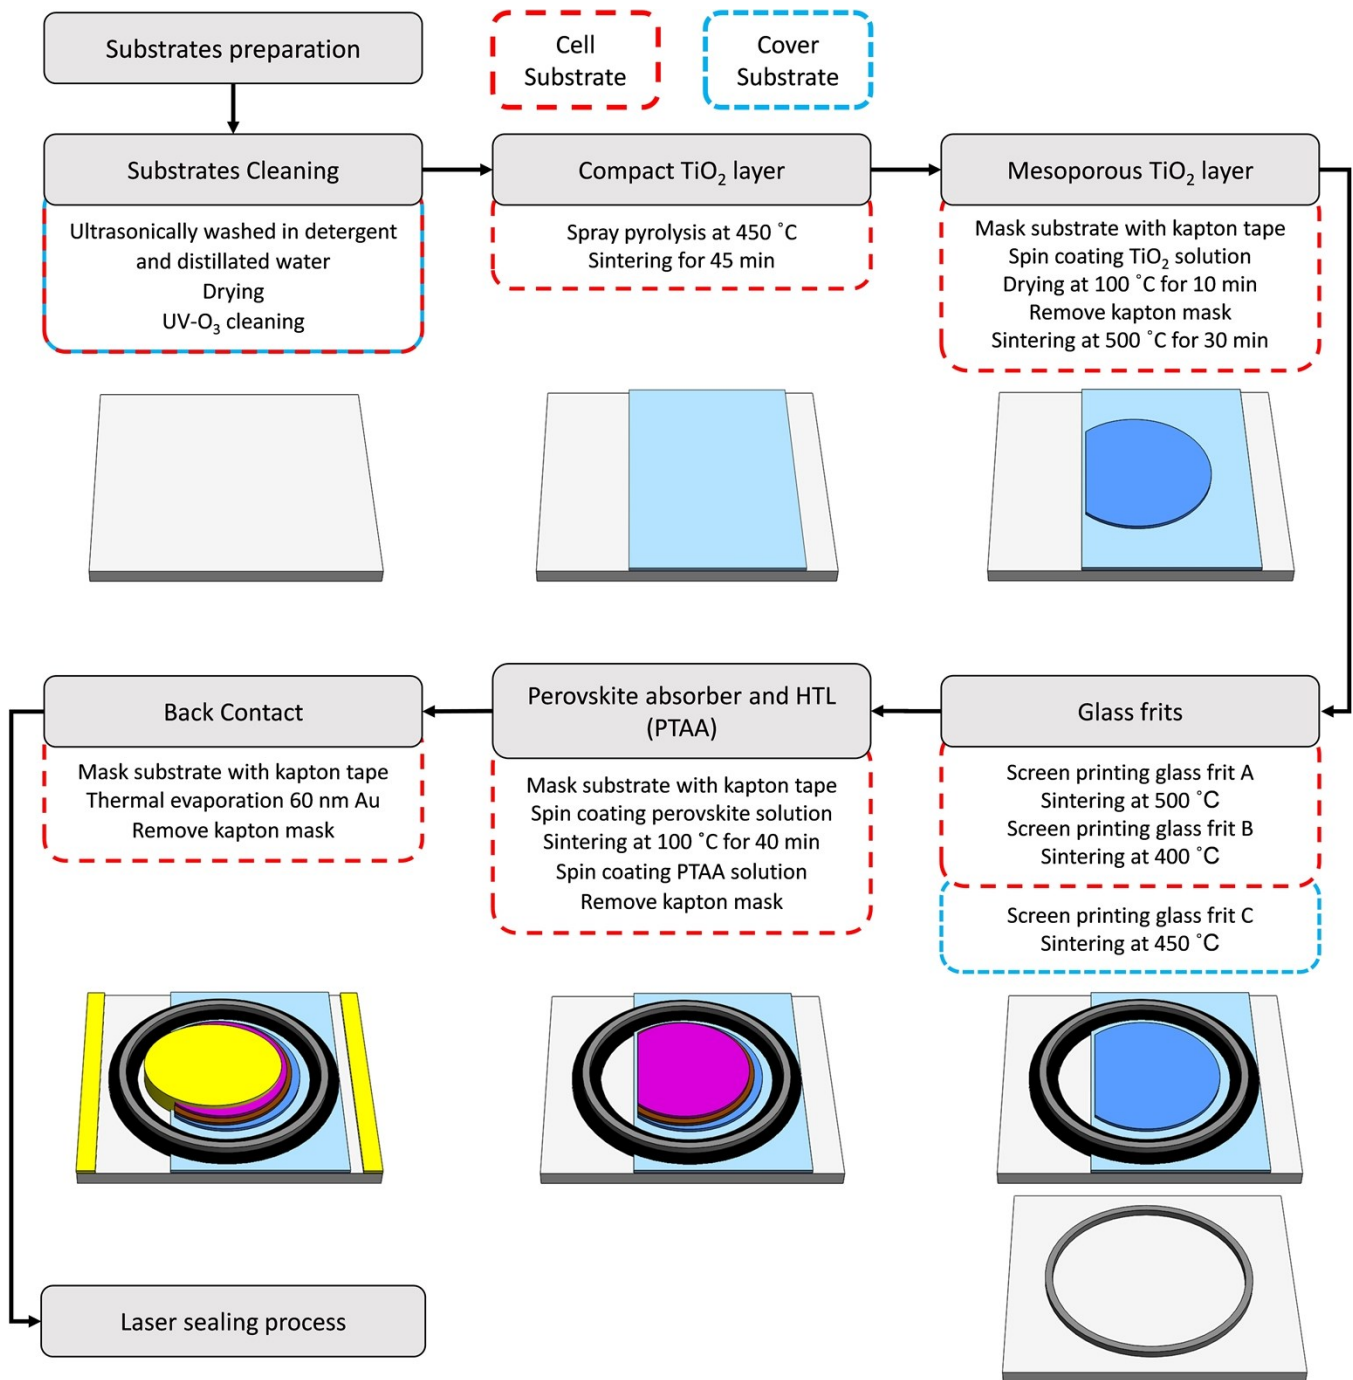

**Figure S1** – Schematic diagram of the procedure for the fabrication of laser-sealed PSCs. Note that the masking steps are not included in the schemes.

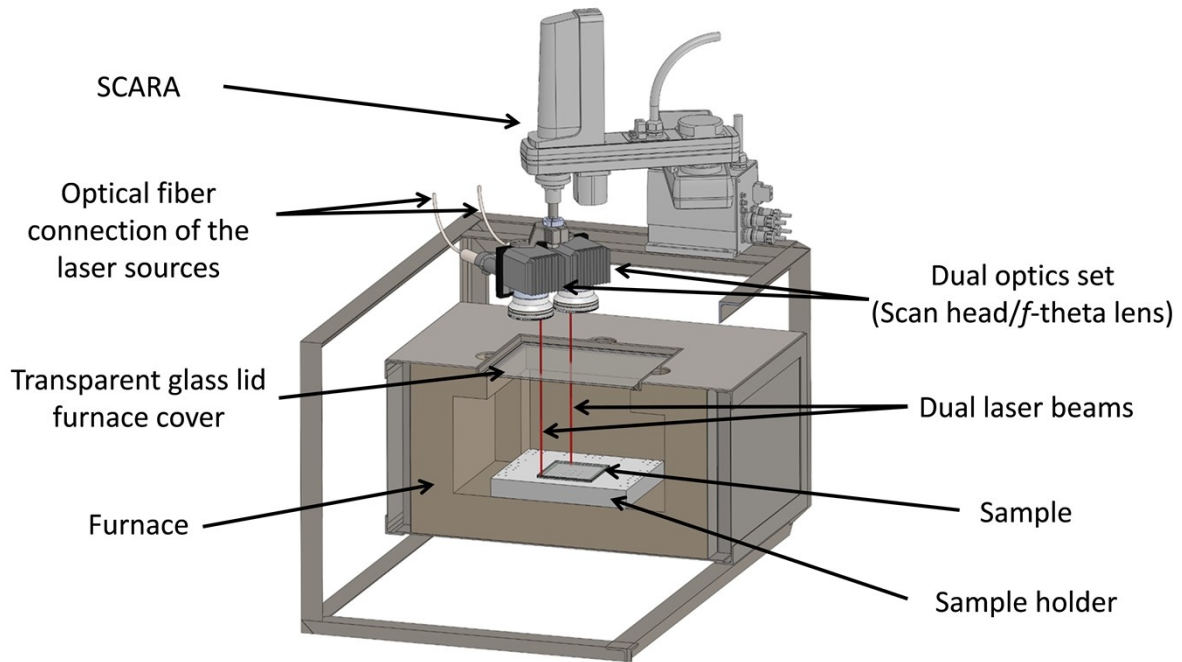

**Figure S2** – Schematic view of “LaserStation” used for the laser assisted glass encapsulation.

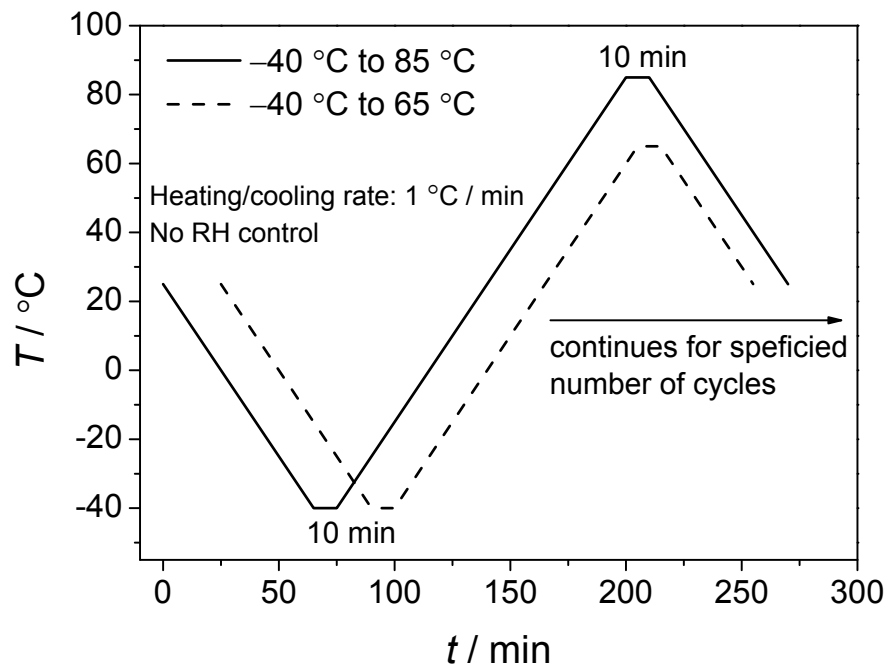

**Figure S3** – Temperature history of the two thermal cycling tests.

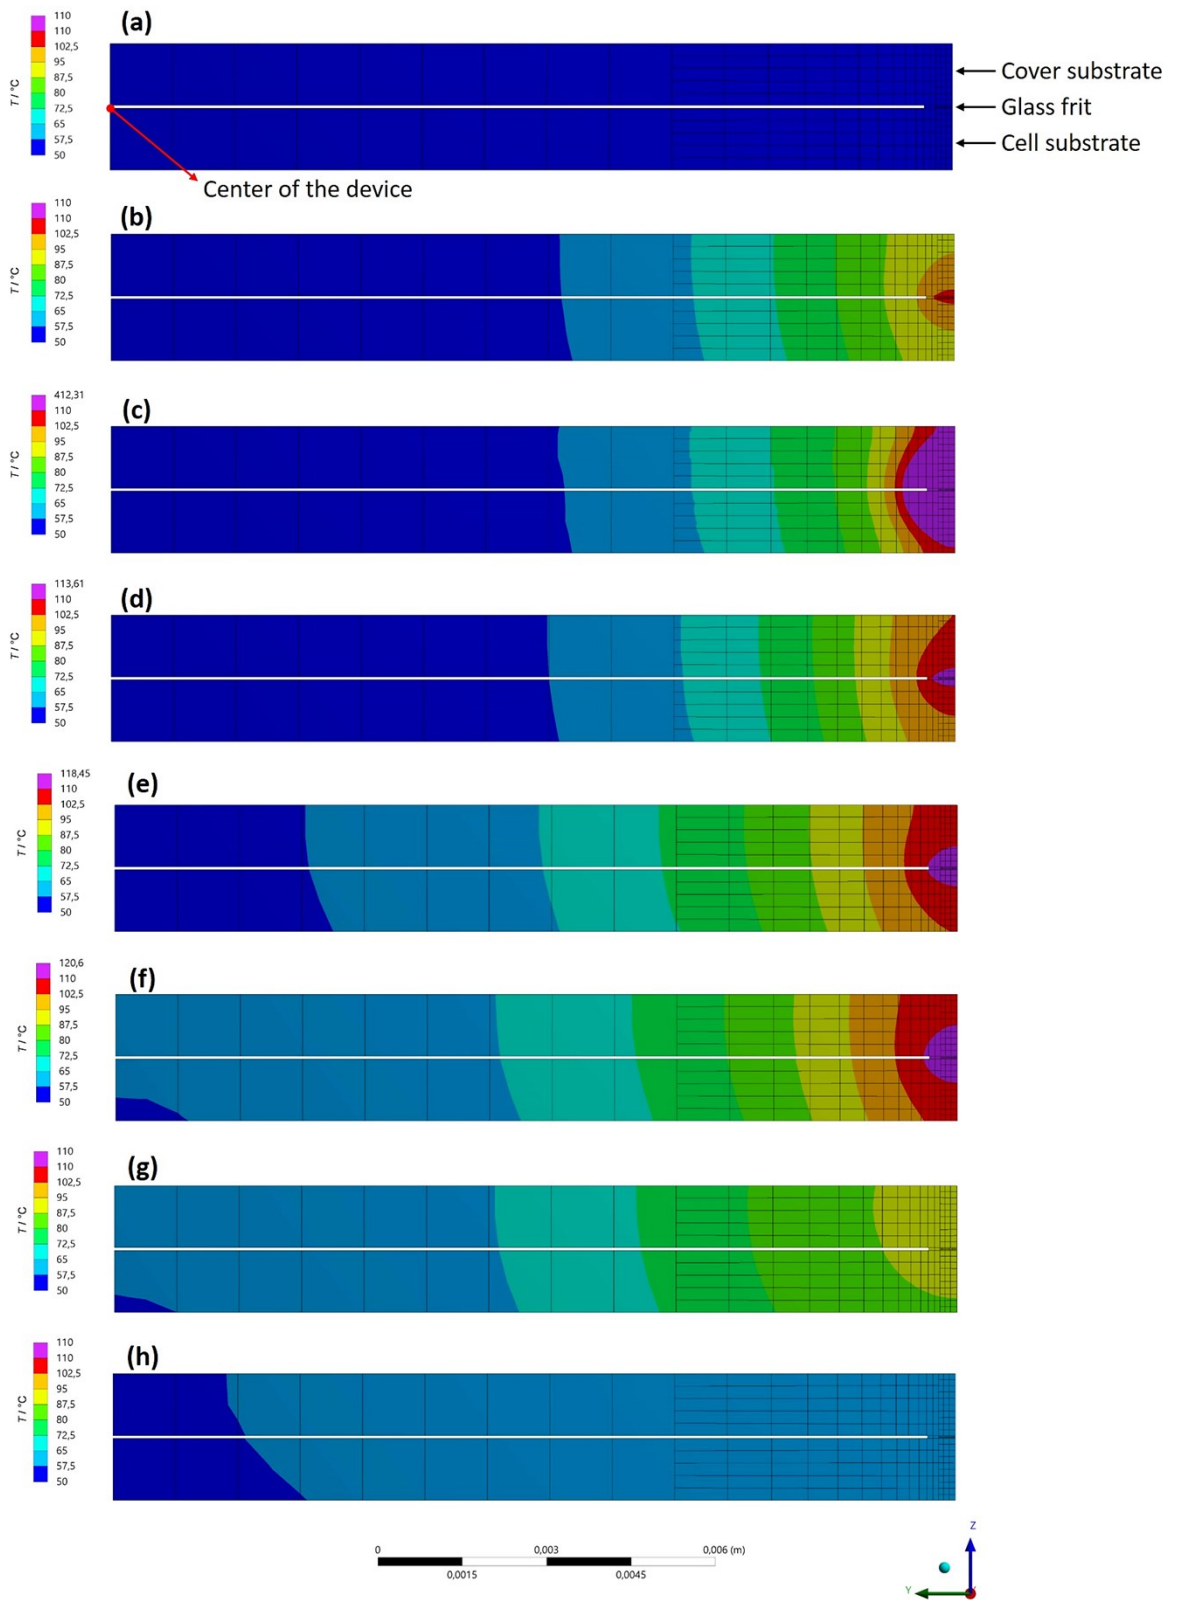

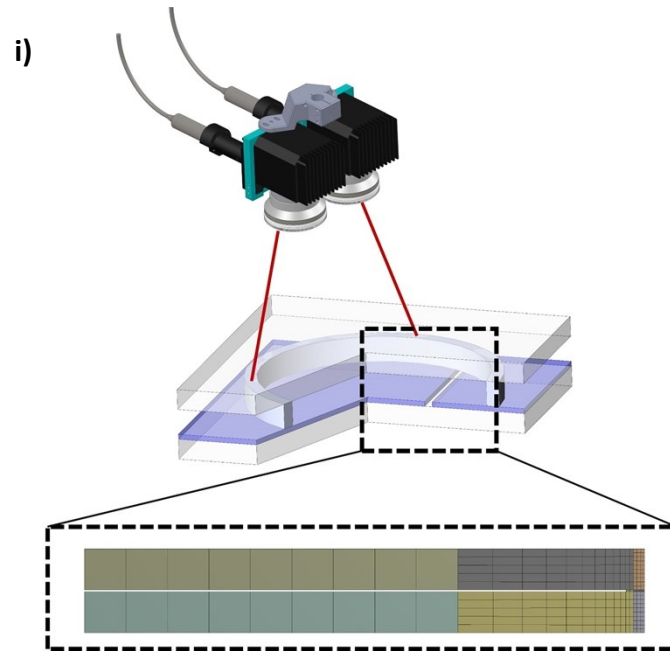

**Figure S4** – Simulated temperature during the sealing process at the glass frit and substrates. (a) the device is placed in the furnace at the process temperature of 50 °C until a homogeneous temperature is reached (temperature stabilization period is not represented), (b)  $LB_{heat}$  starts to radiate and the temperature in the sealant increases up to  $110 \pm 10$  °C (c)  $LB_{bond}$  is emitted and the, temperature in the glass frit reaches up to > 380 °C, bonding the substrates, (d, e and f)  $LB_{bond}$  is turned off and  $LB_{heat}$  continues emitting, maintaining the sealant material at  $110 \pm 10$  °C, (g and h) laser-sealing conclusion,  $LB_{heat}$  is turned off and the temperature in the sealant decreases to the process temperature, (i) scheme of the cross-section view of the simulation model.

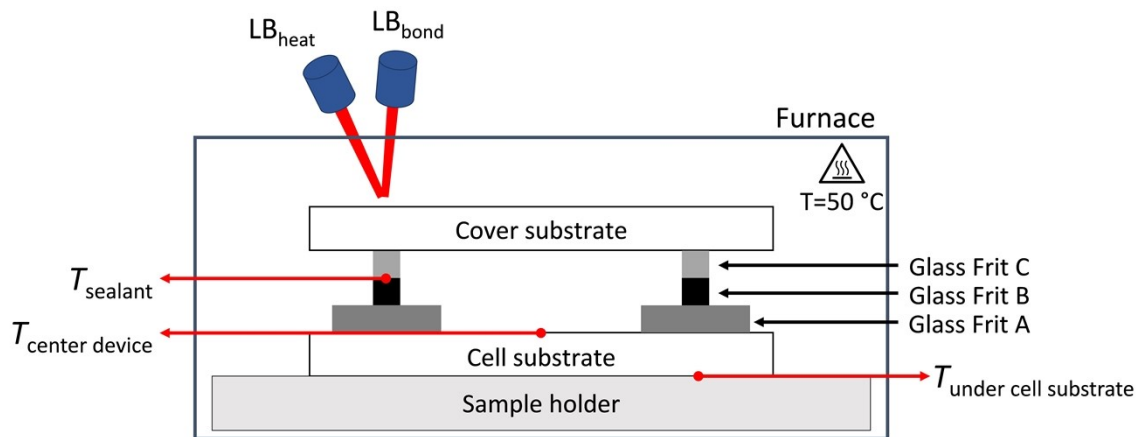

**Figure S5** – Thermocouples positions for temperature measurement during sealing process.

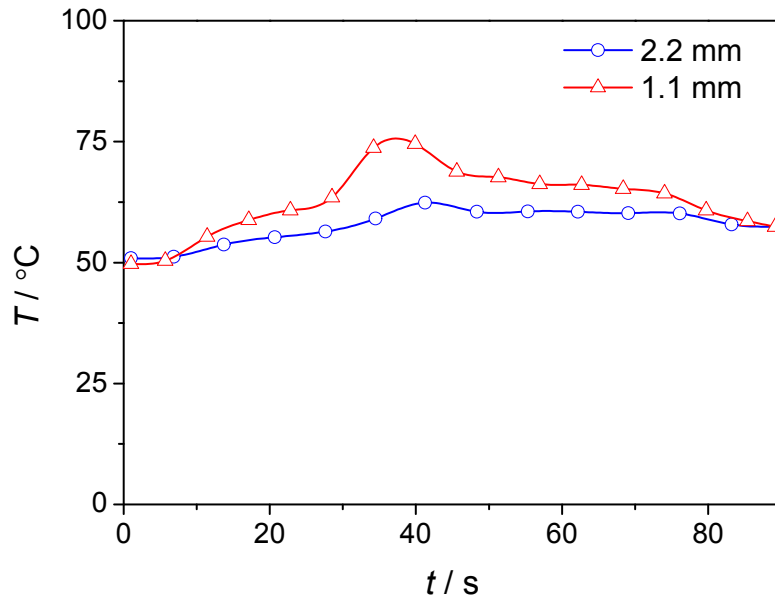

**Figure S6** – Temperature history at the rear side of the glass (*i.e.* under cell substrate) for 2.2 mm and 1.1 mm thick glass substrates.

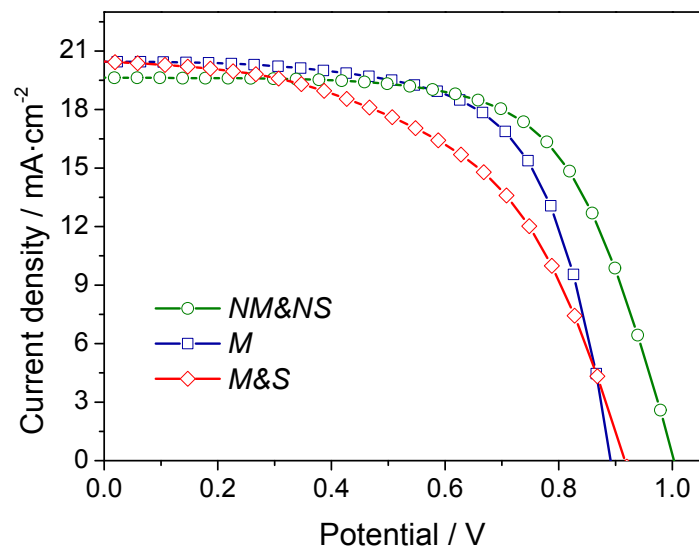

**Figure S7**– Current density vs. potential curves of *NS&NM*, *M* and *M&S* devices.

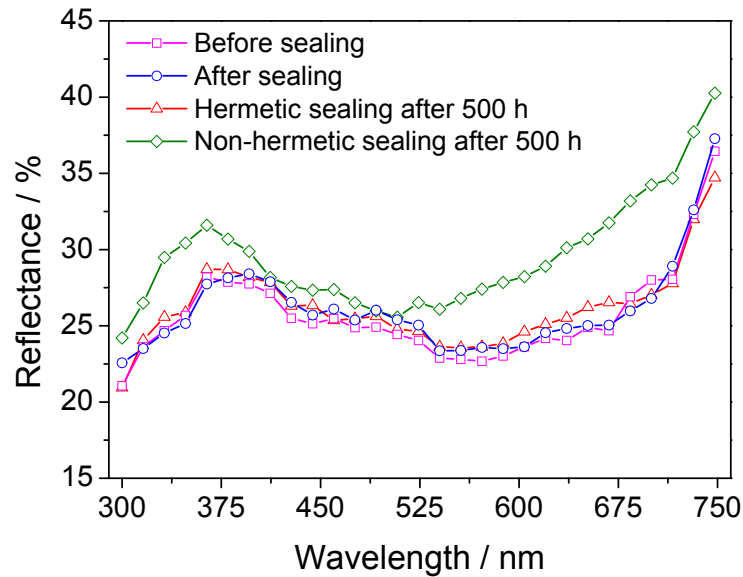

**Figure S8** – Reflectance spectra of a PSC before and after sealing process; and for a hermetically and a non-hermetically encapsulated devices, after 500 h of humid air exposure.

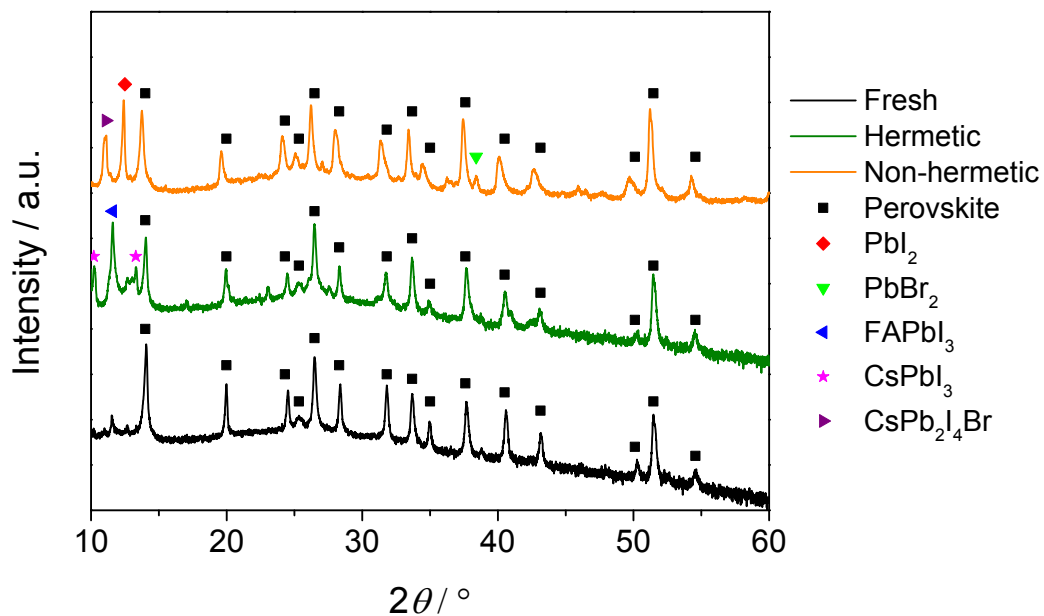

**Figure S9** – XRD pattern for a fresh device and for hermetically and non-hermetically encapsulated devices, after the thermal cycling test between  $-40\text{ }^{\circ}\text{C}$  to  $85\text{ }^{\circ}\text{C}$ .



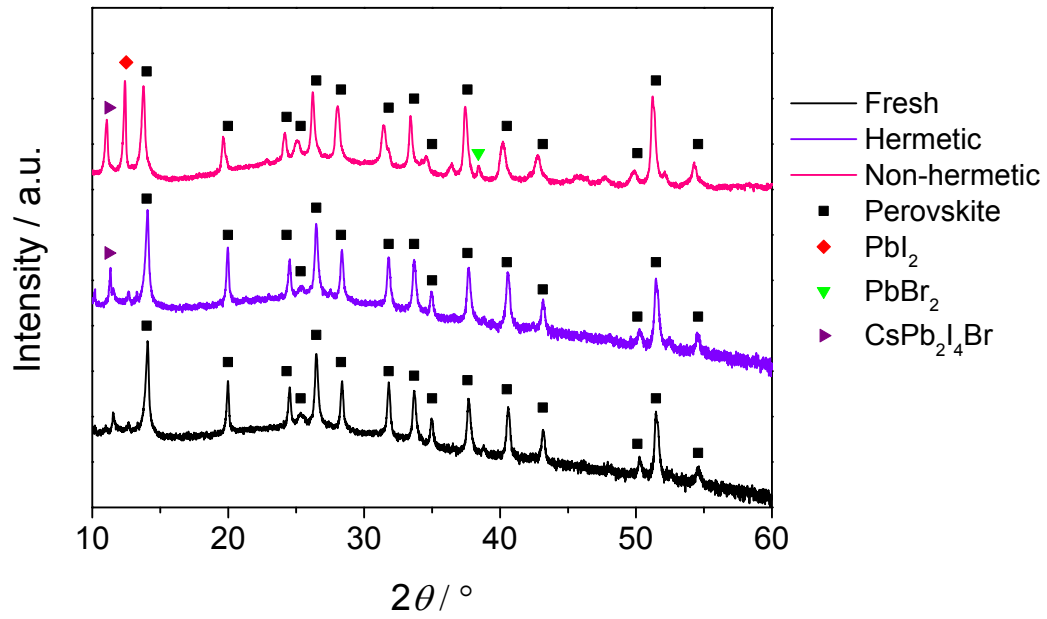

**Figure S10** – XRD pattern for a fresh device and for hermetically and non-hermetically encapsulated devices, after the thermal cycling test between  $-40^\circ\text{C}$  to  $65^\circ\text{C}$ .
